# Supplementary material for: Understanding of the Electrochemical Behavior of Lithium at Bilayer-Patched Epitaxial Graphene/4H-SiC
Source: MDPI journal article supplement (doi:10.3390/nano12132229), 2022-06-29
Supplement: s1 [file s1]

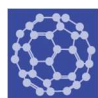

## Supplementary Materials

# Understanding of the Electrochemical Behavior of Lithium at Bilayer-Patched Epitaxial Graphene/4H-SiC

Ivan Shtepliuk <sup>1,\*</sup>, Mikhail Vagin <sup>2</sup>, Ziyaeddin Khan <sup>2</sup>, Alexei A. Zakharov <sup>3</sup>, Tihomir Iakimov <sup>1</sup>, Filippo Giannazzo <sup>4</sup>, Ivan G. Ivanov <sup>1</sup> and Rositsa Yakimova <sup>1</sup>

<sup>1</sup> Department of Physics, Chemistry and Biology, Linköping University, SE-58183 Linköping, Sweden; ivan.shtepliuk@liu.se (I.S.); tihomir.iakimov@liu.se (T.I.); ivan.gueorguiev.ivanov@liu.se (I.G.I.); rositsa.yakimova@liu.se (R.Y.)

<sup>2</sup> Laboratory of Organic Electronics, Department of Science and Technology, Linköping University, SE-60174 Norrköping, Sweden; mikhail.vagin@liu.se (M.V.); ziyauddin.khan@liu.se (Z.K.)

<sup>3</sup> MAX IV Laboratory, Lund University, Fotongatan 2, SE-22484 Lund, Sweden; alexei.zakharov@maxiv.lu.se

<sup>4</sup> CNR-IMM, Strada VIII, 5, 95121 Catania, Italy; Filippo.Giannazzo@imm.cnr.it

\* Correspondence: ivan.shtepliuk@liu.se; Tel.: +46-766-524-089

**Citation:** Shtepliuk, I.; Vagin, M.; Khan, Z.; Zakharov, A.A.; Iakimov, T.; Ivanov, I.G.; Yakimova, R. Understanding of the Electrochemical Behavior of Lithium at Bilayer-Patched Epitaxial Graphene/4H-SiC. *Nanomaterials* **2022**, *12*, 2229. <https://doi.org/10.3390/nano12132229>

Academic Editors: Alessandro Molle and Emiliano Bonera

Received: 13 June 2022

Accepted: 28 June 2022

Published: 29 June 2022

**Publisher's Note:** MDPI stays neutral with regard to jurisdictional claims in published maps and institutional affiliations.

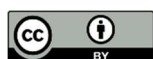

**Copyright:** © 2022 by the authors. Licensee MDPI, Basel, Switzerland. This article is an open access article distributed under the terms and conditions of the Creative Commons Attribution (CC BY) license (<https://creativecommons.org/licenses/by/4.0/>).

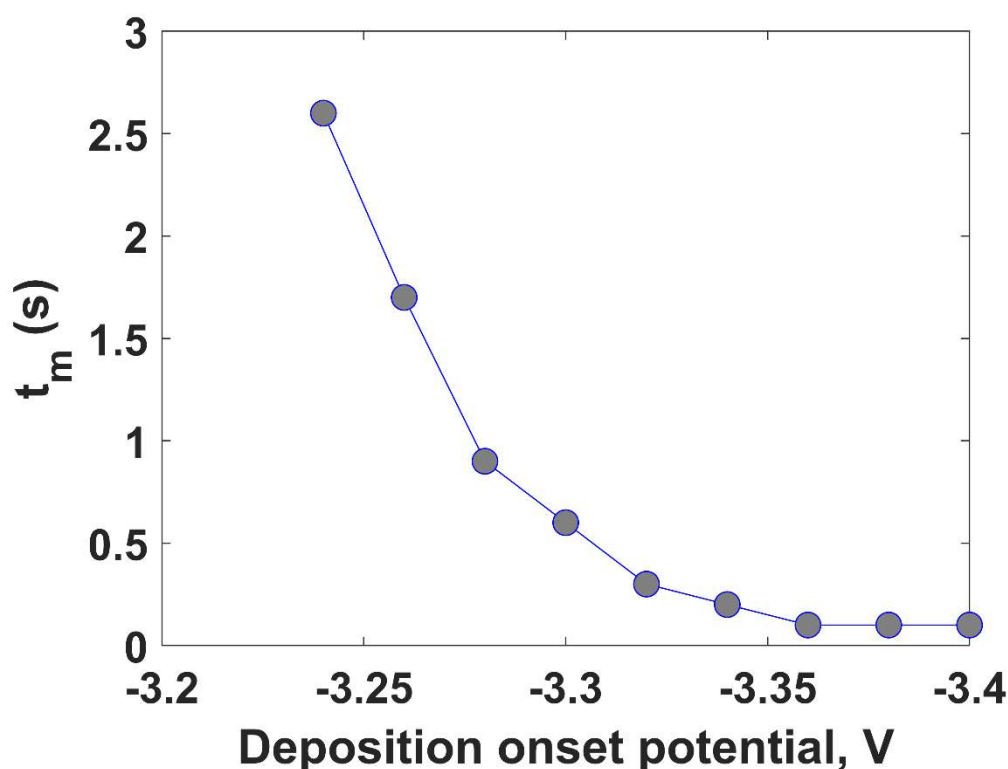

**Figure S1.** The relationship between the maximum time that corresponds to maximum current density, and the deposition potential.

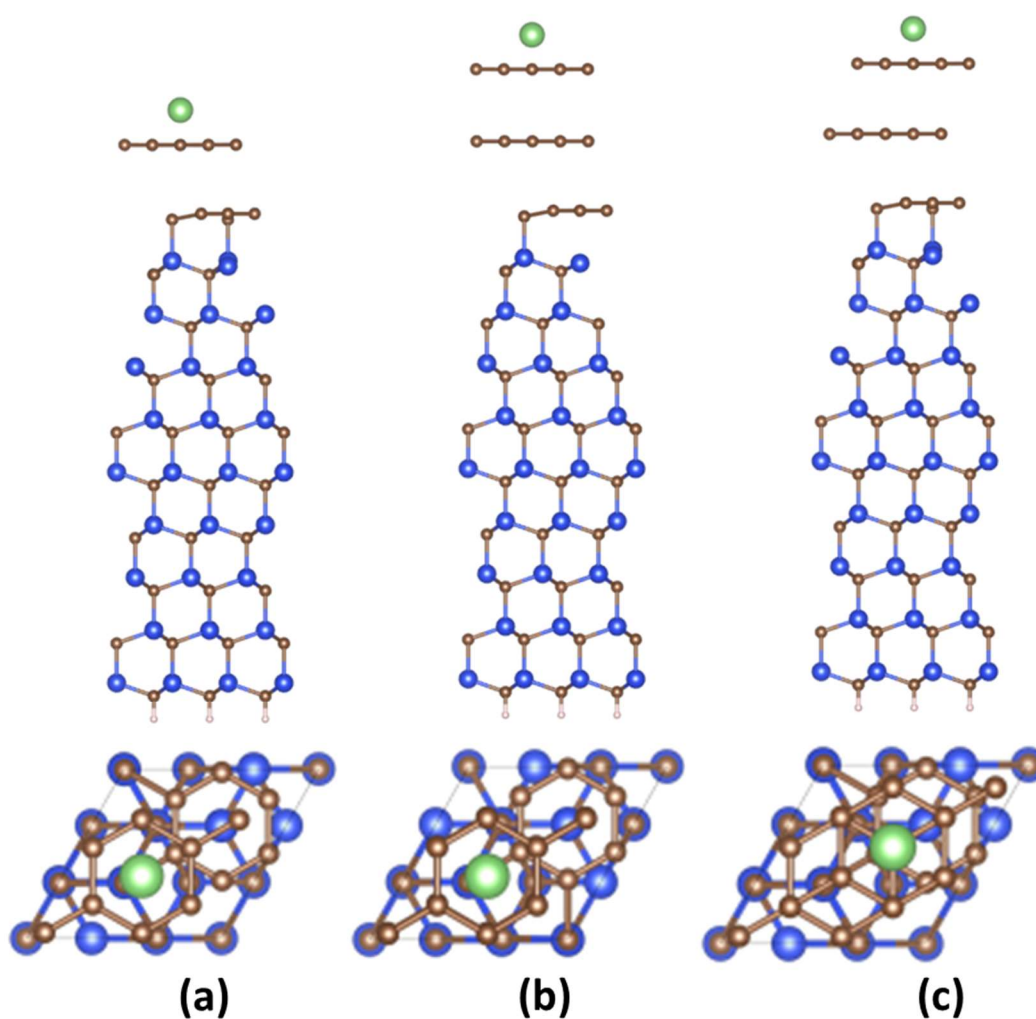

**Figure S2.** (Side and top views) Optimized structures of (a) MLG/SiC, (b) AA-BLG/SiC, and (c) AB-BLG/SiC electrodes with adsorbed Li atom. Blue, green, whitish, and brown balls represent silicon, lithium, hydrogen, and carbon atoms, respectively.

#### D Raman peak analysis

The *D* Raman mode region can be well fitted by a single Lorentzian peak with fitting errors as low as 3.158% and 3.015% for samples lithiated at −4 V and −5 V, respectively. The corresponding goodness of fit ( $R^2$ ) is predicted to be 0.988 for both cases (see Figure S2, Supporting Information). As we observed *G* peak splitting into two components, we should estimate two different amplitude ratios:  $D/G_1$  and  $D/G_2$ . As these ratios for BLPMLG/SiC lithiated at −4V are larger than those for that lithiated at −5V (0.90 and 1.15 vs. 0.51 and 0.49, respectively), one can only conclude that the latter lithiation conditions result in reduced defectiveness of BLPMLG/SiC.

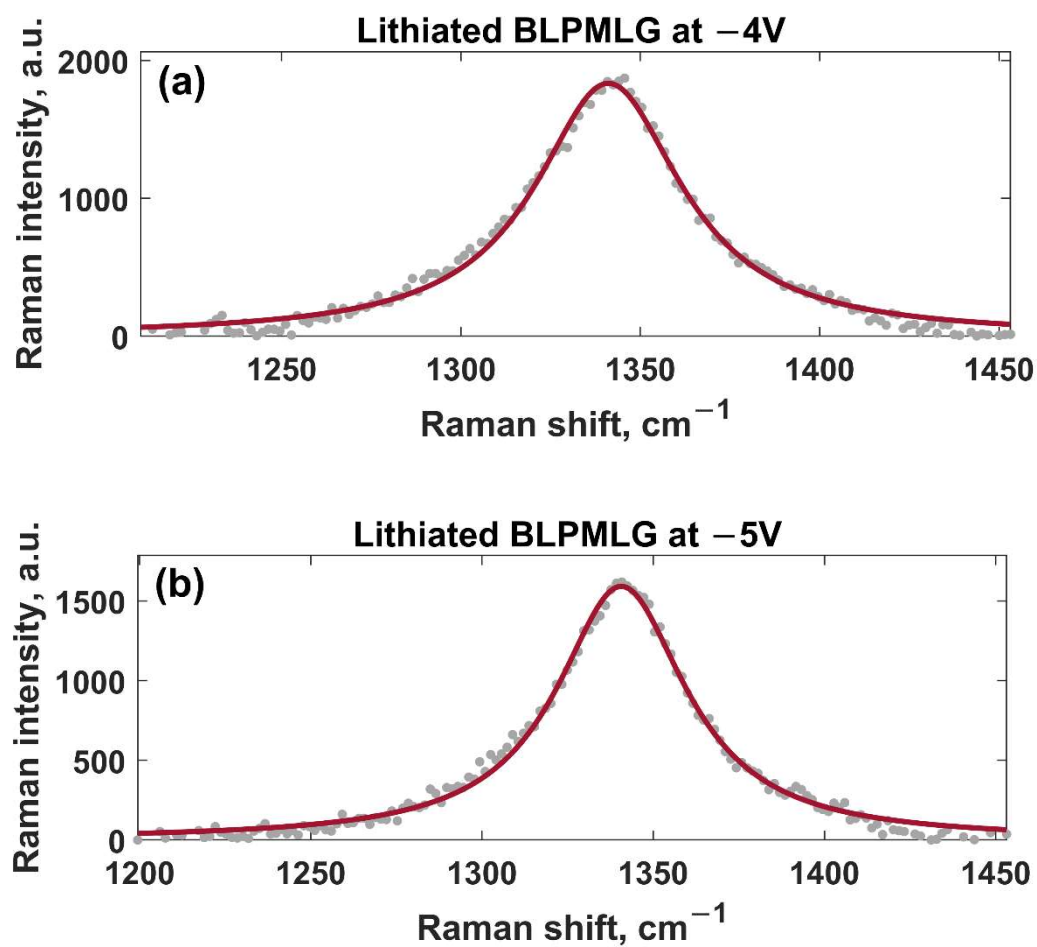

**Figure S3.** Spectral regions corresponding to *D* Raman peak of BLPMLG/SiC lithiated at (a) -4 V and (b) -5 V. Grey dots are experimental data, while the solid dark red curves are the fitting Lorentzian curves.

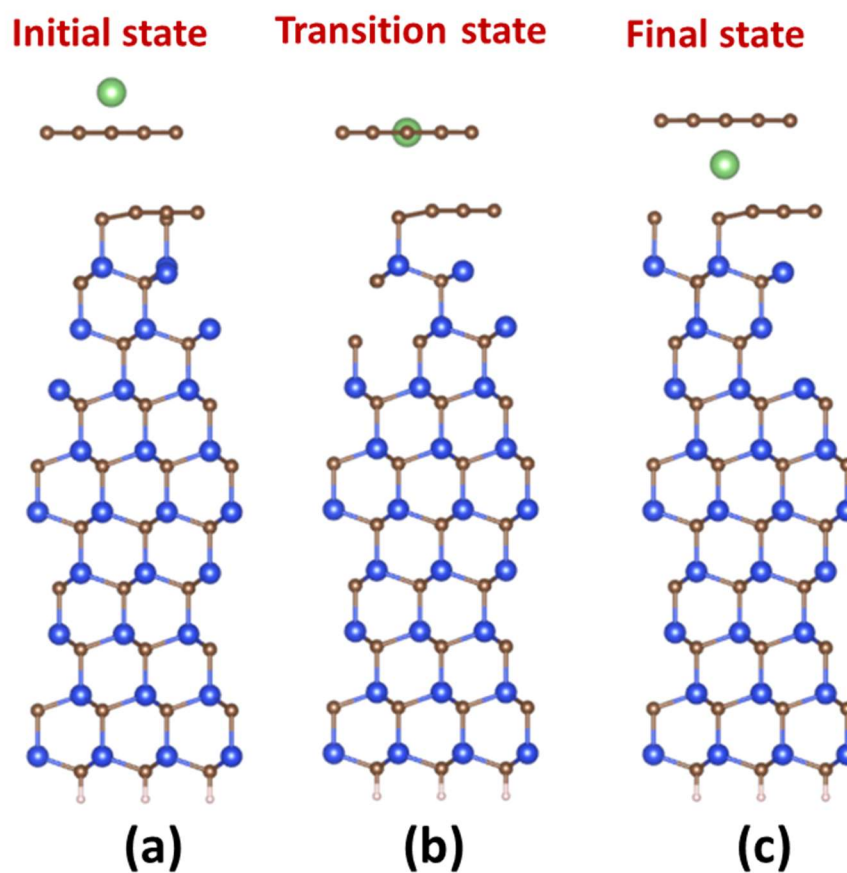

**Figure S4.** Initial (a), transition (b), and final (c) state structures of lithiated MLG/SiC electrode. Transition state structure was predicted by CI-NEB calculations, while initial and final structures were relaxed using the conventional DFT method. Blue, green, whitish, and brown balls represent silicon, lithium, hydrogen, and carbon atoms, respectively.

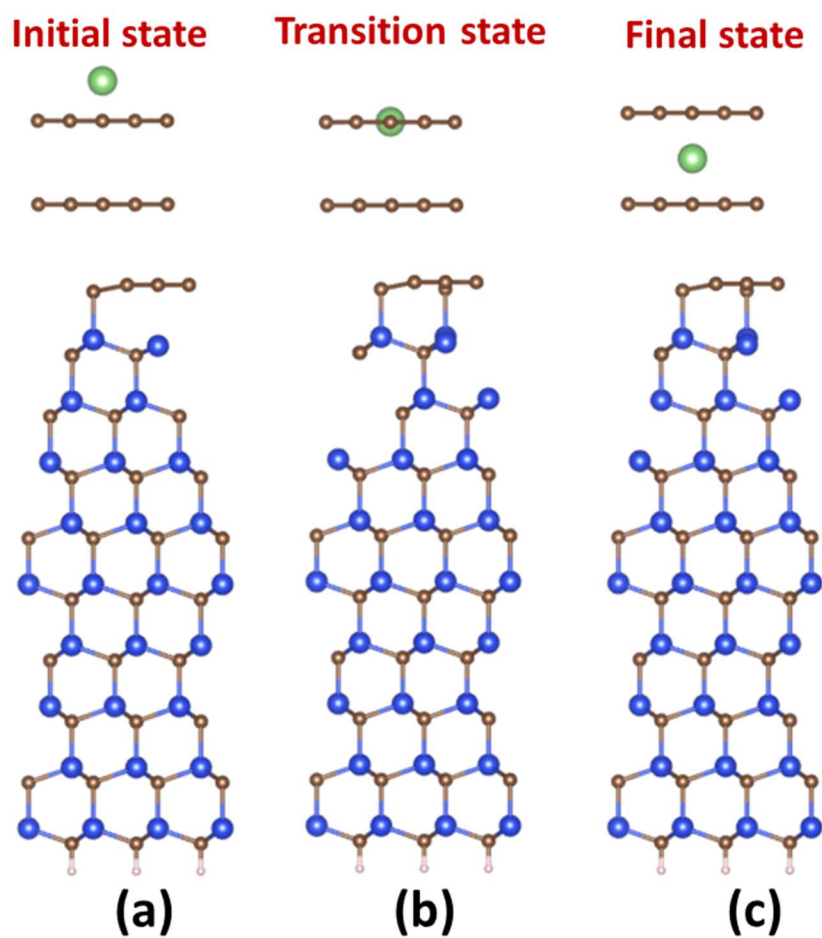

**Figure S5.** Initial (a), transition (b), and final (c) state structures of lithiated AA-BLG/SiC electrode. Transition state structure was predicted by CI-NEB calculations, while initial and final structures were relaxed using the conventional DFT method. Blue, green, whitish, and brown balls represent silicon, lithium, hydrogen, and carbon atoms, respectively.

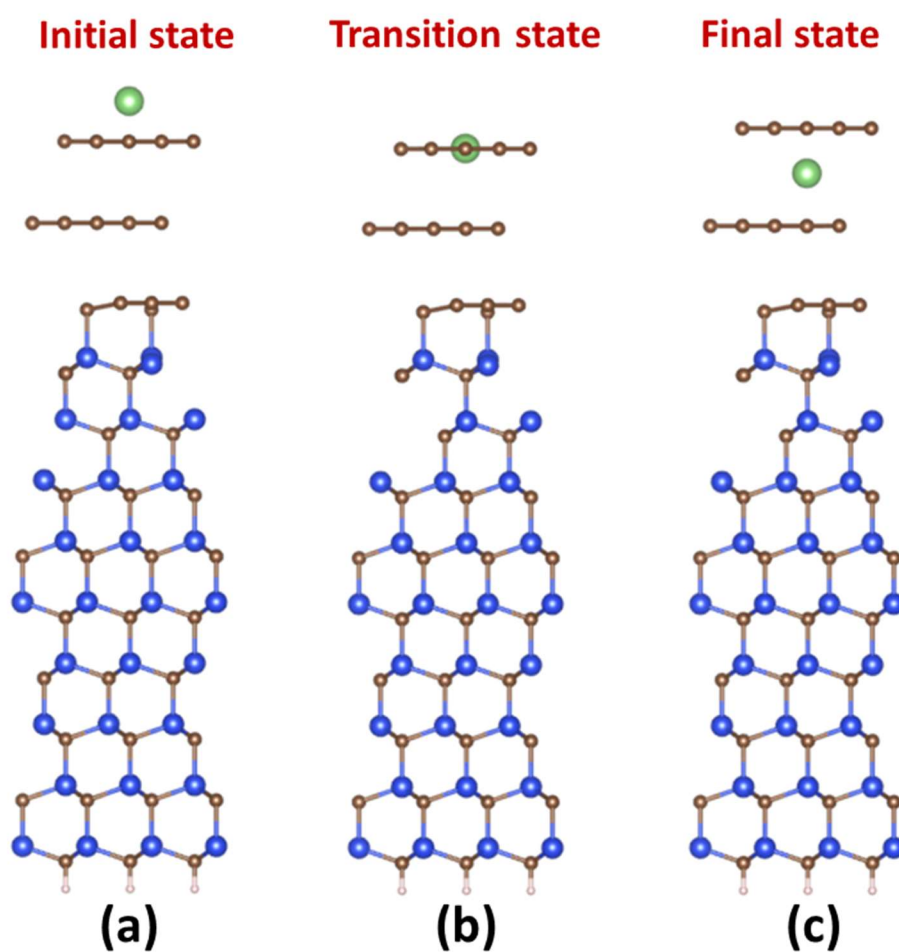

**Figure S6.** Initial (a), transition (b), and final (c) state structures of lithiated AB-BLG/SiC electrode. Transition state structure was predicted by CI-NEB calculations, while initial and final structures were relaxed using the conventional DFT method. Blue, green, whitish, and brown balls represent silicon, lithium, hydrogen, and carbon atoms, respectively.
